# Supplementary material
Source: PubMed Central journal article supplement (PMC8552757)

1 **SUPPLEMENTAL FIGURES**

2 **Figure 1S. Alpha diversity metrics of ceca across time. (A)** Comparison of Observed ASVs, **(B)**  
3 Shannon diversity index and **(C)** Inverse Simpson of different groups (PBS/Vehicle Black,  
4 Low/Vehicle: Orange, High/Vehicle: Blue) separated by dpc from rarified ASV count table. Since the  
5 sample size was limited (n=2 or 3), pair-wise comparisons were not performed. Viral nasal  
6 turbinates (circle), lung (triangle) and brain (asterisk) titers of each group among their respective dpc  
7 are shown above the alpha diversity measure. Percent body weight change for each group at the  
8 respective dpc (2, 5, and 12) is shown above the viral titers. Data including body weight change and  
9 viral titers in the NT, lung and brain was adapted from Cáceres et al. 2021 (43).

10 **Figure 2S. Alpha diversity metrics of cecum samples across time. (A)** Comparison of  
11 Observed ASVs, **(B)** Shannon diversity index and **(C)** Inverse Simpson of infected groups  
12 (Low/Vehicle and High/Vehicle) separated by dpc from rarified ASV count table. All statistical tests  
13 were performed using Kruskal-Wallis or Wilcoxon-rank test for pair-wise comparisons using \* = p<0.05  
14 ; \*\* = p<0.005; \*\*\* = p<0.0005; \*\*\*\* = p<0.00005.

15 **Figure 3S. Alpha diversity metrics of lung samples across time. (A)** Comparison of Observed  
16 ASVs, **(B)** Shannon diversity index and **(C)** Inverse Simpson of different groups (Mock/GC-376:  
17 Brown, Low/GC-376: Green, High/GC-376: Pink) separated by dpc from rarified ASV count table.  
18 Since the sample size was limited (n=2 or 3) pair-wise comparisons were not performed. Viral nasal  
19 turbinates (circle), lung (triangle) and brain (asterisk) titers of each group among their respective dpc  
20 are shown above the alpha diversity measure. Percent body weight change for each group at the  
21 respective dpc (2, 5, and 12 dpc) is shown above the viral titers. Data including body weight change  
22 and viral titers in the NT, lung and brain was adapted from Cáceres et al. 2021 (43).

23 **Figure 4S. Alpha diversity metrics of lung samples across time. (A)** Comparison of Observed  
24 ASVs, **(B)** Shannon diversity index and **(C)** Inverse Simpson of infected groups (Low/GC-376 and  
25 High/GC-376) separated by dpc from rarified ASV count table. All statistical tests were performed  
26 using Kruskal-Wallis or Wilcoxon-rank test for pair-wise comparisons using \* = p<0.05 ; \*\* = p<0.005;  
27 \*\*\* = p<0.0005; \*\*\*\* = p<0.00005.

28 **Figure 5S. Bray-Curtis Dissimilarity distances of lung samples without / with antiviral GC-**  
29 **376.** Comparison of Bray-Curtis dissimilarity distances of mice infected with a A) low dose or (B)  
30 high dose of SARS-CoV-2 with or without GC-376. Gold boxes represent within-group variation  
31 while black boxes represent the between-group variation.

**TABLE S1***Identification of Potential Contaminants by Decontam*

| <b>ASV ID</b> | <b>Kingdom</b> | <b>Phylum</b>  | <b>Class</b>        | <b>Order</b>     | <b>Family</b>     | <b>Genus</b>     |
|---------------|----------------|----------------|---------------------|------------------|-------------------|------------------|
| ASV_249       | Bacteria       | Firmicutes     | Clostridia          | Oscillospirales  | Oscillospiraceae  | Colidextribacter |
| ASV_314       | Bacteria       | Bacteroidota   | Bacteroidia         | Flavobacteriales | Weeksellaceae     | Empedobacter     |
| ASV_355       | Bacteria       | Firmicutes     | Bacilli             | Lactobacillales  | Vagococcaceae     | Vagococcus       |
| ASV_395       | Bacteria       | Proteobacteria | Gammaproteobacteria | Pseudomonadales  | Moraxellaceae     | Acinetobacter    |
| ASV_398       | Bacteria       | Proteobacteria | Gammaproteobacteria | Pseudomonadales  | Moraxellaceae     | Acinetobacter    |
| ASV_470       | Bacteria       | Proteobacteria | Alphaproteobacteria | Rhodobacterales  | Rhodobacteraceae  | Gemmobacter      |
| ASV_522       | Bacteria       | Firmicutes     | Clostridia          | Oscillospirales  | Oscillospiraceae  | NA               |
| ASV_635       | Bacteria       | Proteobacteria | Gammaproteobacteria | Pseudomonadales  | Moraxellaceae     | Acinetobacter    |
| ASV_680       | Bacteria       | Proteobacteria | Alphaproteobacteria | Sphingomonadales | Sphingomonadaceae | Sphingomonas     |
| ASV_714       | Bacteria       | Firmicutes     | Bacilli             | Lactobacillales  | Streptococcaceae  | Lactococcus      |

|         |          |                |                     |                 |                  |                |
|---------|----------|----------------|---------------------|-----------------|------------------|----------------|
| ASV_725 | Bacteria | Proteobacteria | Gammaproteobacteria | Pseudomonadales | Pseudomonadaceae | Pseudomonas    |
| ASV_739 | Bacteria | Proteobacteria | Gammaproteobacteria | Burkholderiales | Comamonadaceae   | NA             |
| ASV_761 | Bacteria | Firmicutes     | Clostridia          | Oscillospirales | Oscillospiraceae | Flavonifractor |
| ASV_865 | Bacteria | Firmicutes     | Clostridia          | Lachnospirales  | Lachnospiraceae  | NA             |

**A**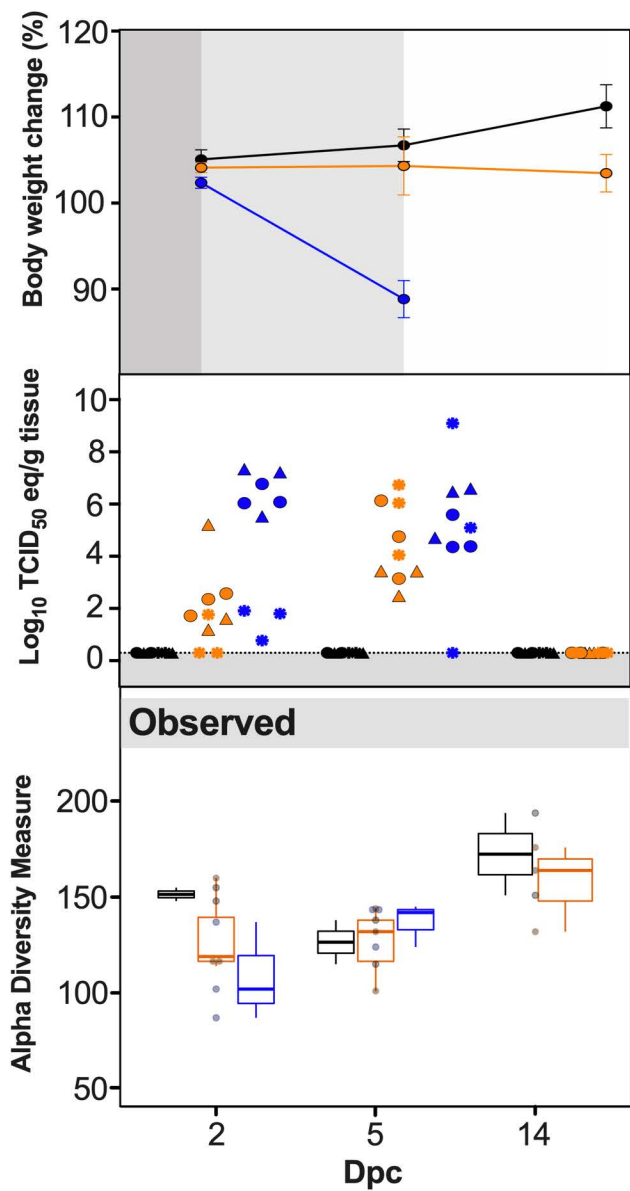**B**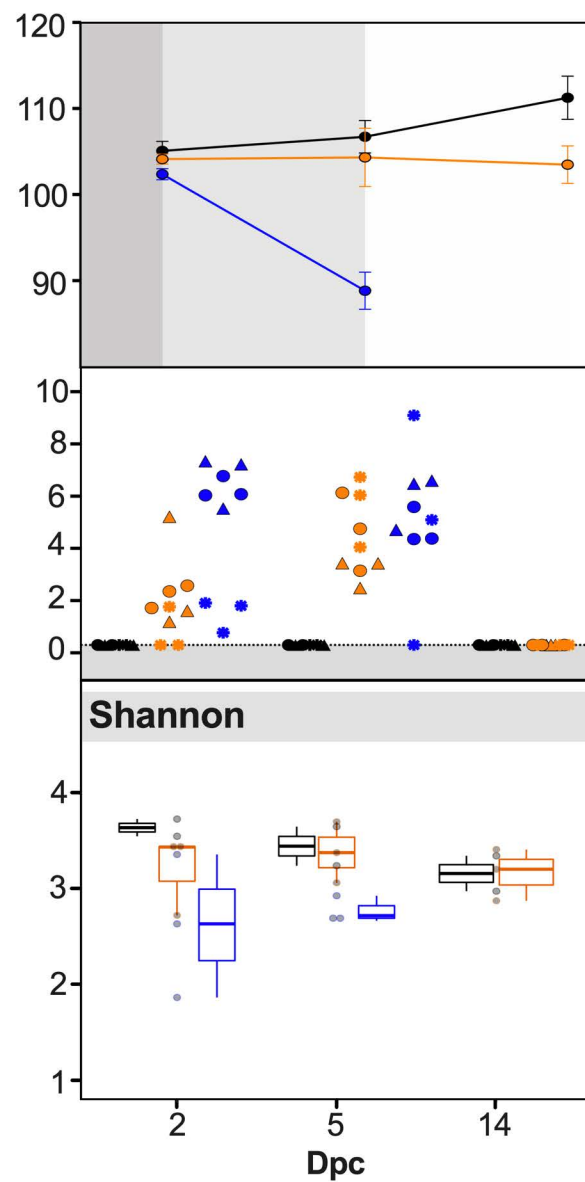**C**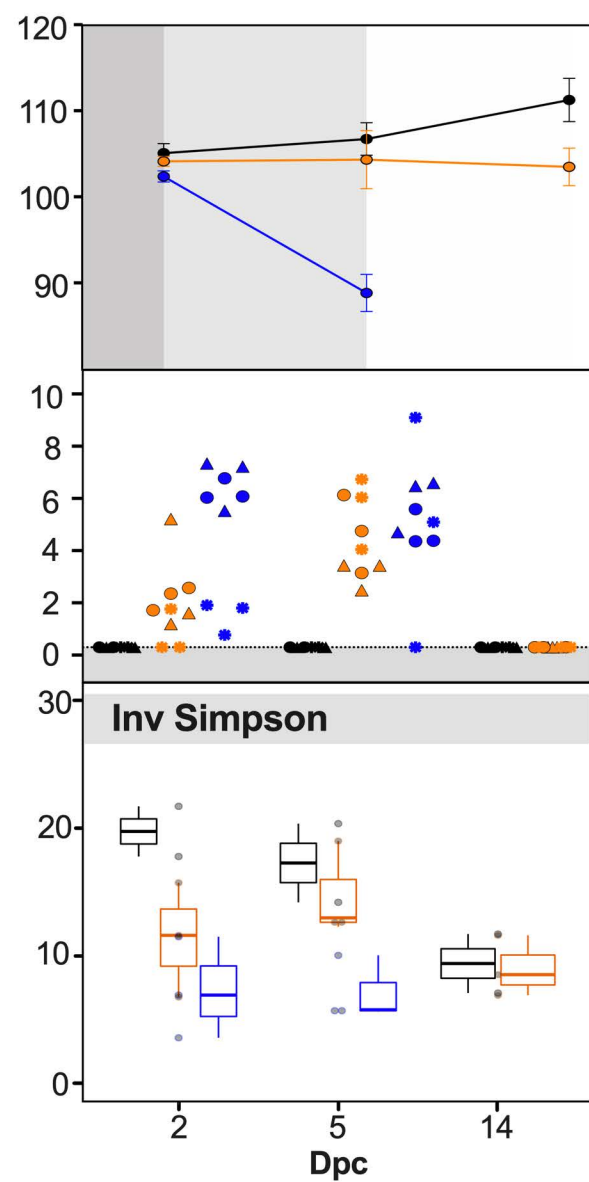**Groups**

● PBS/Vehicle

● Low/Vehicle

● High/Vehicle

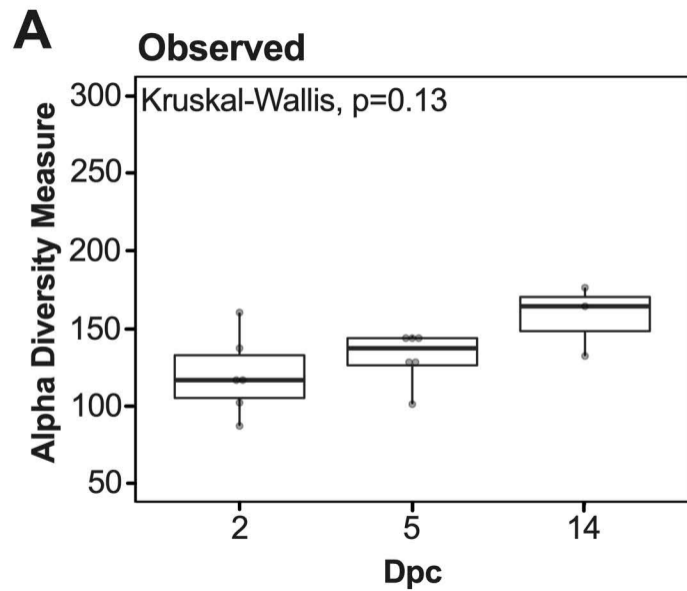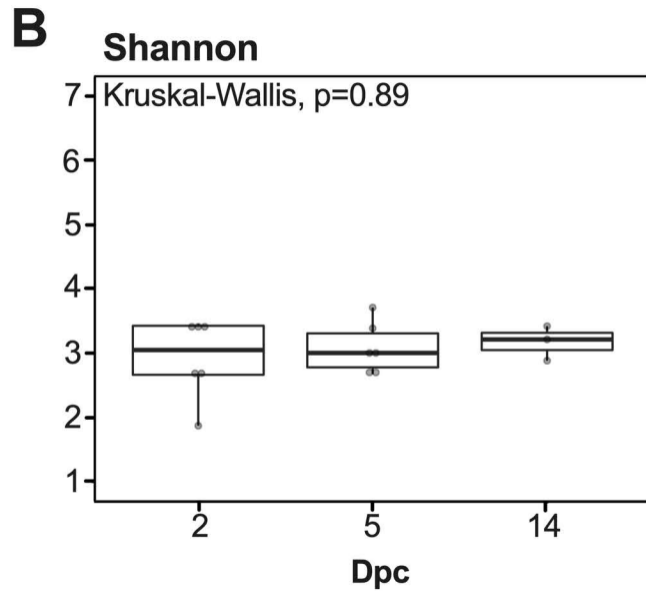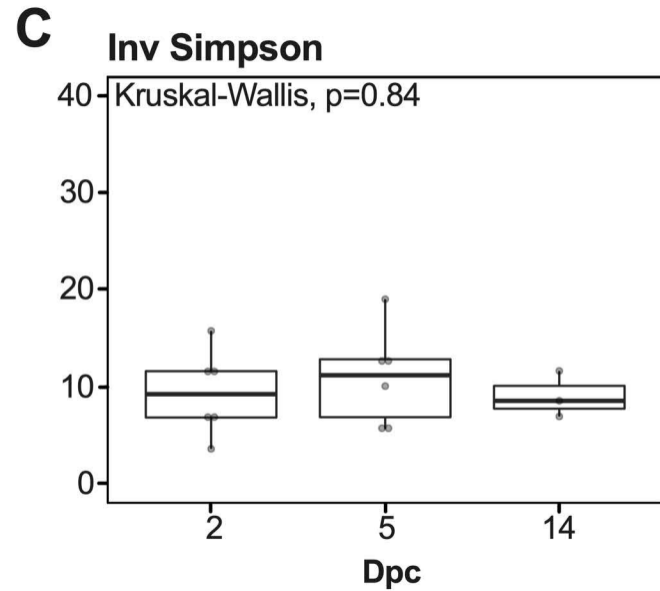

**A**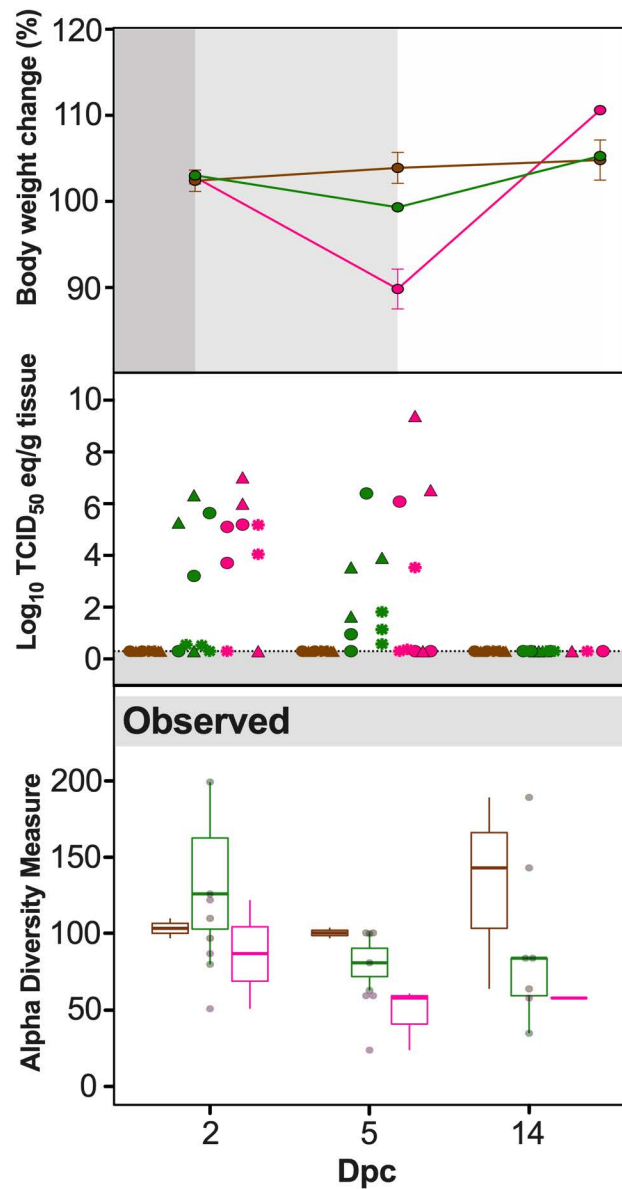**B**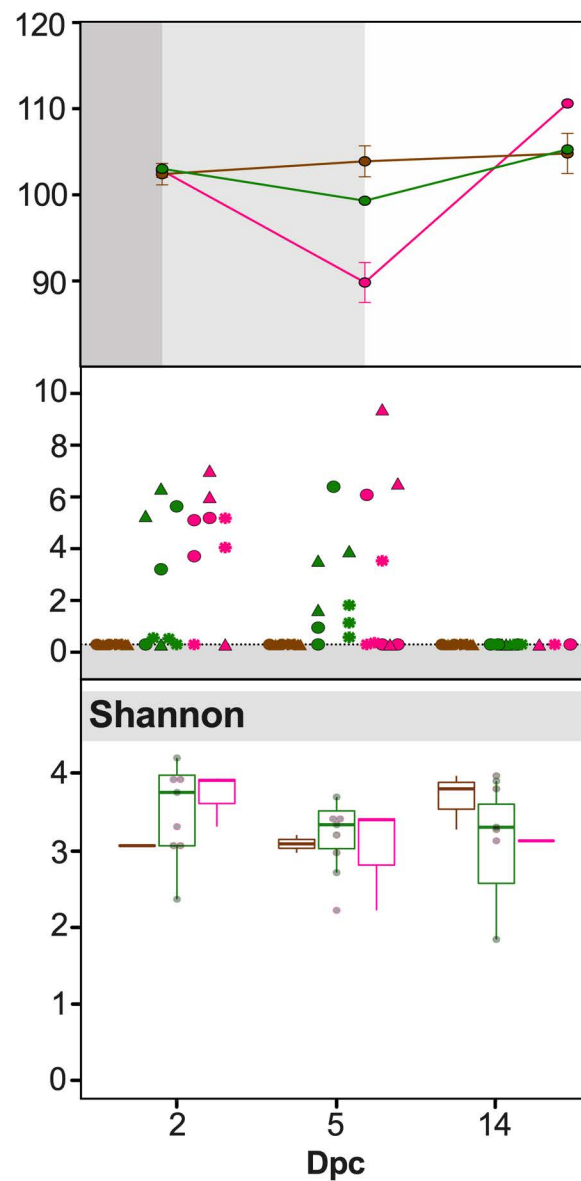**C**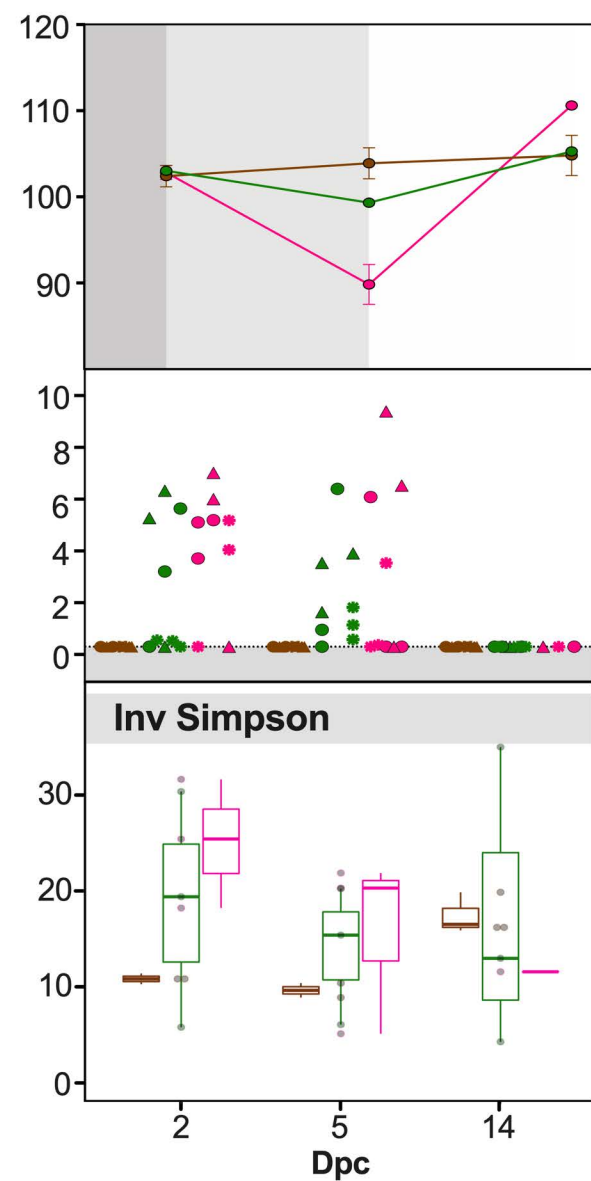

**Groups** ● Mock/GC-376 ● Low/GC-376 ● High/GC-376

**A**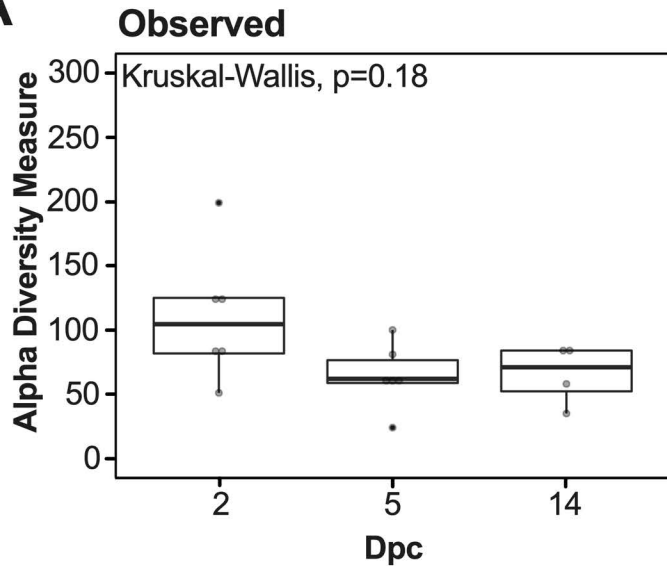**B**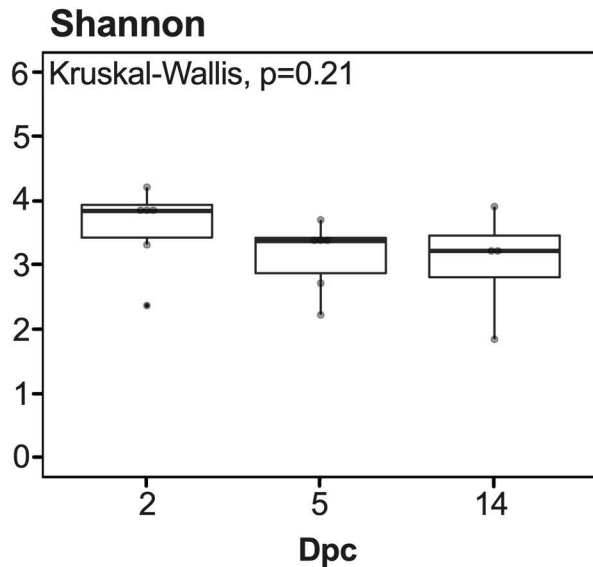**C**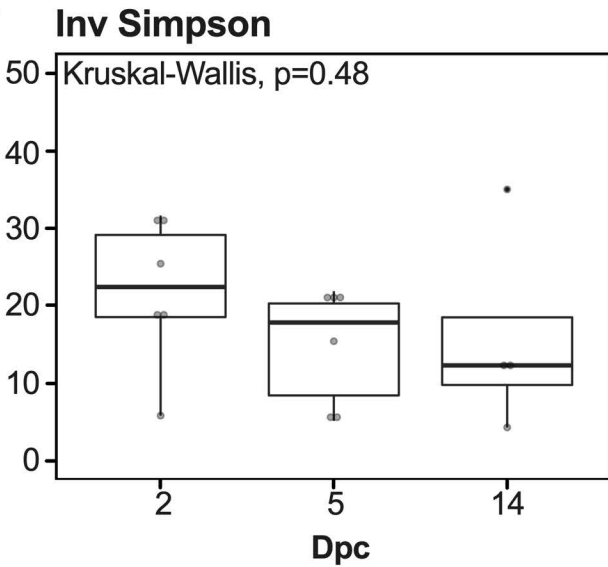

**A**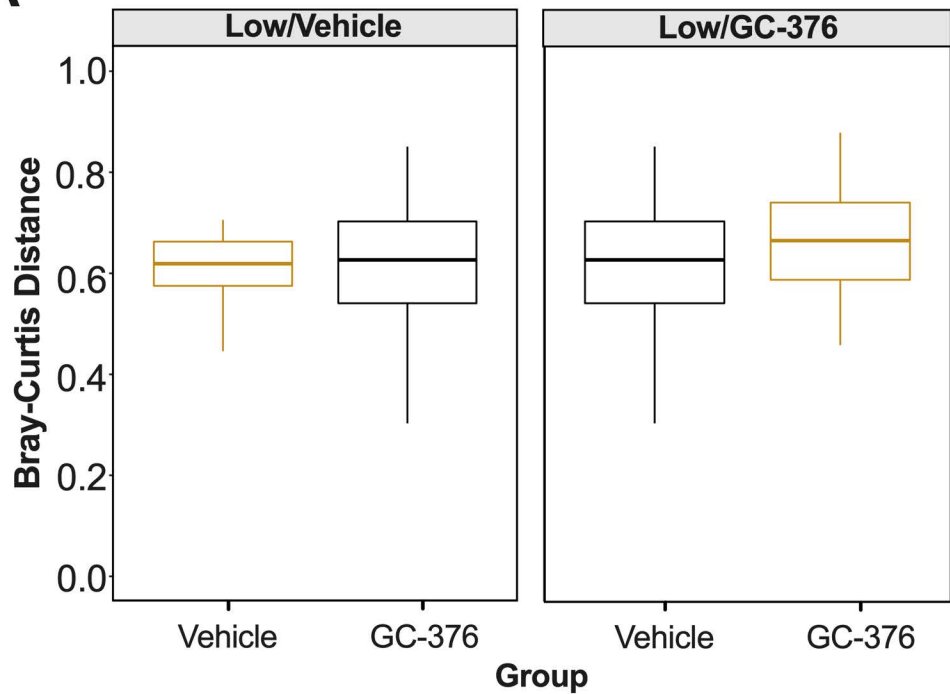**B**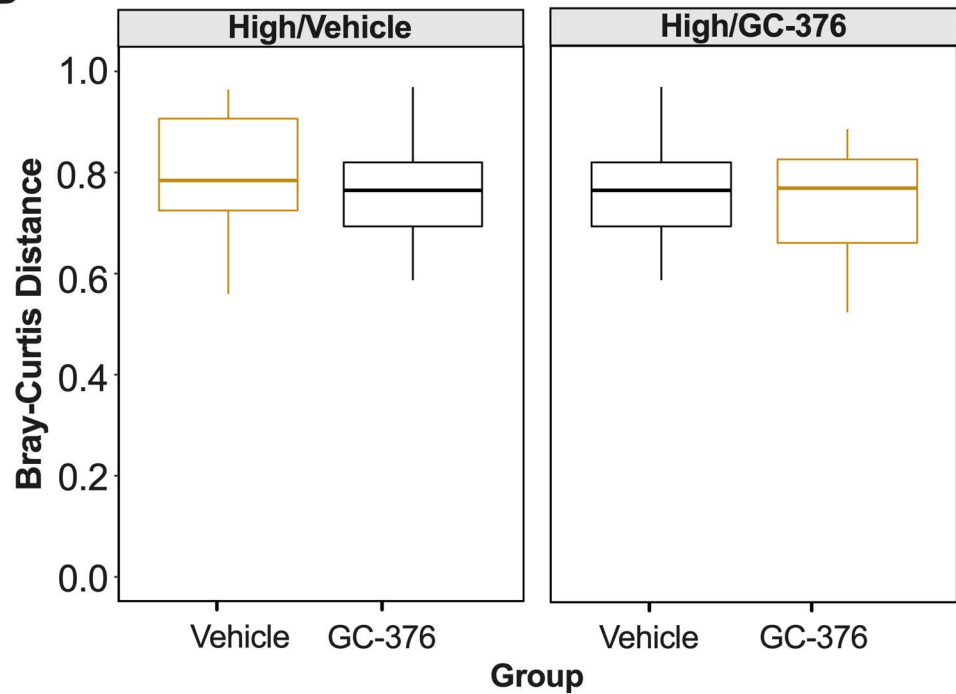

Supplement: spectrum00536-21_supp_1_seq11.pdf [file spectrum00536-21_supp_1_seq11.pdf]
